# Supplementary material for: Extended-Spectrum ß-Lactamase-Producing Escherichia coli in Conventional and Organic Pig Fattening Farms
Source: MDPI journal article supplement (doi:10.3390/microorganisms10030603), 2022-03-11
Supplement: s1 [file s1]

|                                                                                     | Farm 1                                              | Farm 2                                                             | Farm 3                               | Farm 4a                                               | Farm 4b                                               | Farm 5                                                | Farm 6                                                          | Farm 7                                                    |
|-------------------------------------------------------------------------------------|-----------------------------------------------------|--------------------------------------------------------------------|--------------------------------------|-------------------------------------------------------|-------------------------------------------------------|-------------------------------------------------------|-----------------------------------------------------------------|-----------------------------------------------------------|
| <b>Production type</b>                                                              | fattening                                           | closed system                                                      | Piglet rearing and fattening         | fattening                                             | fattening                                             | fattening                                             | Piglet rearing and fattening                                    | closed system                                             |
| <b>Number of fattening pigs</b>                                                     | 3,500                                               | 4,600                                                              | 2,600                                | 500                                                   | 1,000                                                 | 1,280                                                 | 1,000                                                           | 1,400                                                     |
| <b>Number of barn buildings</b>                                                     | 2                                                   | 4                                                                  | 4                                    | 3                                                     | 4                                                     | 2                                                     | 4                                                               | 1                                                         |
| <b>Year of construction</b>                                                         | 2002, 2006                                          | late 1980ies<br>1 Building 2010                                    | 1970ies                              | 1970ies                                               | 1970ies                                               | 2008/2009, 2018                                       | 1970ies, 1998                                                   | 1975                                                      |
| <b>Stocking frequency</b>                                                           | continuously                                        | continuously                                                       | Irregular<br>(depending on capacity) | Irregular<br>(depending on availability of suppliers)           | continuously                                              |
| <b>Within a radius of up to 3km</b><br>- Pig farms<br>- Water bodies with waterfowl | +                                                   | -                                                                  | -                                    | +                                                     | +                                                     | -                                                     | -                                                               | -                                                         |
|                                                                                     | +                                                   | +                                                                  | +                                    | +                                                     | +                                                     | -                                                     | +                                                               | +                                                         |
| <b>Care of the pigs</b>                                                             | Farm Manager<br>Family members<br>Unskilled workers | Farm Manager<br>Family members<br>Trainees<br>Semi-skilled workers | Farm Manager<br>Skilled staff        | Skilled staff                                         | Skilled staff                                         | Skilled staff                                         | Farm Manager<br>Family members<br>Trainees<br>Unskilled workers | Farm Manager<br>Specialized staff<br>Semi-skilled workers |
| <b>Responsibility of employees</b>                                                  | Access to all buildings of the farm                 | Rotation between the stables                                       | Access to all buildings of the farm  | Rotation between the stables                          | Rotation between the stables                          | Access to all buildings of the farm                   | Access to all buildings of the farm                             | Only for specific stable                                  |
| <b>Change of personnel on weekends, holidays, in vacation time</b>                  | +                                                   | -                                                                  | +                                    | +                                                     | +                                                     | +                                                     | -                                                               | -                                                         |
| <b>Access for visitors (e.g. transporters, feed consultants)</b>                    | +                                                   | +<br>School classes                                                | +                                    | -                                                     | -                                                     | +                                                     | +<br>School classes<br>Kindergartens                            | +                                                         |
| <b>Private pig farming of employees</b>                                             | Forbidden                                           | Forbidden                                                          | Forbidden                            | Forbidden                                             | Forbidden                                             | Forbidden                                             | Not forbidden                                                   | Forbidden                                                 |
| <b>Participation in quality programs</b>                                            | QS-System                                           | Tierwohl                                                           | QS-System                            | Biopark                                               | Biopark                                               | Biokreis                                              | Biopark                                                         | Naturland                                                 |

| Purchase of fattening pigs                                                          | 1 origin                        | No purchase                               | 4 origins                                | 2 origins                                | 1 origin                                 | 2 origins                                | 1 origin                                                       | No purchase                                                                 |
|-------------------------------------------------------------------------------------|---------------------------------|-------------------------------------------|------------------------------------------|------------------------------------------|------------------------------------------|------------------------------------------|----------------------------------------------------------------|-----------------------------------------------------------------------------|
| Duration of fattening period in weeks                                               | 16-18                           | 13                                        | 16                                       | 18-19                                    | 18-19                                    | 14-17                                    | 17                                                             | 14-20                                                                       |
| Cleaning and disinfection of the compartments and outlets after each fattening run. | +                               | +                                         | +                                        | -                                        | -                                        | +                                        | +                                                              | -                                                                           |
| Cleaning and disinfection of driveways                                              | As needed                       | After each fattening run                  | As needed                                | No driveways                             | No driveways                             | No driveways                             | Weekly                                                         | After each fattening run                                                    |
| hygiene sluice for each stable                                                      | +                               | +                                         | +                                        | -                                        | -                                        | +                                        | -                                                              | -                                                                           |
| disinfection mats for each stable                                                   | -<br>(stable specific boots)    | -<br>(stable specific boots)              | +                                        | +                                        | +                                        | +                                        | +                                                              | -<br>(stable specific boots)                                                |
| Use of homeopathic drugs                                                            | -                               | -                                         | -                                        | -                                        | -                                        | -                                        | +                                                              | -                                                                           |
| Use of antiparasitic drugs                                                          | -                               | +(irregular)                              | +(irregular)                             | -                                        | -                                        | +(regular)                               | +(regular)                                                     | -                                                                           |
| Vaccination                                                                         | +<br>PCV2,<br><i>Mycoplasma</i> | +<br>PCV2,<br><i>Haemophilus parasuis</i> | +<br>PCV2,<br><i>Mycoplasma</i><br>PRRSV | +<br><i>Erysipelothrix rhusiopathiae</i> | +<br><i>Erysipelothrix rhusiopathiae</i> | +<br><i>Erysipelothrix rhusiopathiae</i> | +<br>PCV2,<br><i>Mycoplasma</i> ,<br><i>Lawsonia</i> ,<br>STEC | +<br>PCV2,<br><i>Mycoplasma</i> ,<br>STEC, <i>Salmonella</i><br>Typhimurium |
| Use of antibiotic drugs                                                             | +                               | +                                         | +                                        | +                                        | +                                        | +                                        | +                                                              | +                                                                           |
| Frequency of the use of antibiotic drugs (estimate of the farm manager)             | rarely                          | rarely                                    | often                                    | rarely                                   | sometimes                                | rarely                                   | sometimes                                                      | rarely                                                                      |
| Group treatment with antibiotic drugs                                               | -                               | -                                         | +                                        | -                                        | +                                        | -                                        | +                                                              | -                                                                           |

| Application route of antibiotic drugs | Injection            | Injection                                                           | Injection (individual animals) via feed/drinking water (group)                                                                                                                                                                                                                          | Injection                | Injection                  | Injection                                                              | Injection (individual animals) Via drinking water (piglets)                 | Injection                                     |
|---------------------------------------|----------------------|---------------------------------------------------------------------|-----------------------------------------------------------------------------------------------------------------------------------------------------------------------------------------------------------------------------------------------------------------------------------------|--------------------------|----------------------------|------------------------------------------------------------------------|-----------------------------------------------------------------------------|-----------------------------------------------|
| Antibiotic substances used            | Tylosin<br>Cefquinom | Amoxicillin<br>Sulfonamid<br>Ceftiofur<br>Tulathromycin<br>Colistin | Injection (individual animals) via feed/drinking water (group)<br>Fattening pigs:<br>Chlortetracycline<br>Sulfamethoxazole<br>Marbofloxacin<br>Cefquinom<br>Piglets:<br>Amoxicillin<br>Doxycycline/hydrochloride<br>Lincomycin/Spec tinomycin<br>Marbfoxacin<br>Enrofloxacin<br>Tylosin | Tylosin<br>Tulathromycin | Ceftiofur<br>Tulathromycin | Procain-Benzyl-penicillin<br>Enrofloxacin<br>Sulfadimidin/Trimethoprim | Tiamulin<br>Tylosin<br>Ceftiofur<br>Enrofloxacin<br>Colistinsulfat (Ferkel) | Amoxicillin<br>Tulathromycin<br>Marbofloxacin |
