# Supplementary material for: Extended-Spectrum ß-Lactamase-Producing Escherichia coli in Conventional and Organic Pig Fattening Farms
Source: MDPI journal article supplement (doi:10.3390/microorganisms10030603), 2022-03-11
Supplement: s1 [file s1]

## **Questionnaire**

### **General information about the farm**

#### **1. production type and how many of them**

- ☐ Sucking piglets
- ☐ Weaned piglets
- ☐ Rearing Pigs
- ☐ Gilts
- ☐ Sows
- ☐ Boars
- ☐ Fattening pigs

### **Fattening area**

- 1. How many barn buildings are there?**
- 2. when was the stable building built?**
- 3. how many intended animal places are there in total in the barn under investigation?**
- 4. how many intended animal places are there in total in the compartment?**
- 5. how many age groups are there in these stalls?**
- 6. how many pens are there in the compartment?**
- 7. how many animals are currently in the compartment?**
- 8. date of housing (of sampled animals)?**
- 9. Type of husbandry**
  - ☐ Conventional
  - ☐ Do you participate in any special programs?
    - ☐ Yes: .....
    - ☐ No
  - ☐ Organic
    - a) When did you switch to organic farming?
    - b) Do you belong to an association?
      - ☐ Yes:
      - ☐ No
- 10. What breed/s of pigs do you keep?**  
.....

**11.** Which and how many of the listed animal species are still kept on this farm? Do these animals have contact with the pigs (☐ yes/ ☐ no)?

- ☐ Cattle
- ☐ Poultry
- ☐ Sheep
- ☐ Goats
- ☐ Horses
- ☐ Dogs
- ☐ Cats
- ☐ Rabbits, guinea pigs
- ☐ Others: .....

**12.** Which persons take care of the animals? (with number of employees, if applicable)

- ☐ Farm manager
- ☐ Family members
- ☐ Trainees
- ☐ Semi-skilled workers
- ☐ Unskilled workers
- ☐ Skilled workers
- ☐ Others: .....

(a) Employees:

- ☐ are responsible for only one particular barn
- ☐ change between the stables
- ☐ have access to all buildings of the farm.

(b) Is there a change of personnel on weekends, holidays or at vacation time?

- ☐ Yes
- ☐ No

**13.** Which persons have access to the inventory?

- ☐ Farm employees
- ☐ Veterinarian
- ☐ Family members
- ☐ Visitors (e.g., transporters, consultants, feeders, pest control, craftsmen).
- ☐ Other individuals: .....

**14.** Do caregivers have private contact with other animals?

- ☐ Yes, to: .....
- ☐ No

**Specific information about the farm**

**1. How is the farm managed?**

- ☐ closed system
- ☐ piglet rearing operation with attached fattening operation
- ☐ pure fattening operation

**2. Where do the fattening pigs come from?**

- ☐ No animal purchases in the fattening area.
- ☐ Purchases from one origin

- ☐ Purchases from several origins
- ☐ in one delivery
- ☐ in different deliveries
- ☐ from the region
- ☐ from further away
- ☐ always the same supplier
- ☐ different suppliers
- ☐ supplier last changed (date):
- ☐ Do you mix animals from different origins? (or do they stand separately in the barn)
  - ☐ Yes
  - ☐ No

**3. If closed system, how is the flat deck area usually occupied?**

- ☐ Continuous
- ☐ In-out
  - ☐ Pen
  - ☐ Stable

☐ **no spatial separation between flat-deck piglets and fattening pigs.**

**4. how is the fattening area usually occupied?**

- ☐ continuously
- ☐ in-out
  - ☐ Pen
  - ☐ Stable

**5. how long is the fattening period?**

**6. Is there any rehousing during the fattening period?**

- ☐ Yes
- ☐ No

**7. Are individual pigs moved during the fattening period?**

- ☐ Yes
- ☐ No

**Surrounding area**

**1. are there in the immediate vicinity (radius up to approx. 3 km)**

- ☐ Pig farms
- ☐ Cattle farms
- ☐ Poultry farms
- ☐ Sheep and goat farms
- ☐ Keeping horses
- ☐ Water bodies with waterfowl
- ☐ Wildlife and zoo animal holdings
- ☐ Slaughterhouses
- ☐ Processing plants
- ☐ Sewage treatment plants

- ☐ Rendering plants
- ☐ Composting plants
- ☐ Biogas plants
- ☐ Marketing halls
- ☐ Agricultural land
- ☐ Forest
- ☐ Hospital

### **Hygiene and cleaning**

1. which hygiene measures are carried out before entering the stable?
  - ☐ None
  - ☐ Changing clothes/protective clothing/work clothes
  - ☐ Gloves
  - ☐ Hand cleaning
  - ☐ Hand disinfection
  - ☐ Boot cleaning
  - ☐ Boot disinfection
  - ☐ Boots are used ONLY for this barn and therefore are not cleaned every time.
2. how is access to the stalls done?
  - ☐ There is no hygiene lock.
  - ☐ There are disinfection mats/disinfection tubs for all stalls.
  - ☐ Each stall has its own disinfection mat/disinfection tray.
3. what other protective measures do you have?
  - ☐ None
  - ☐ Fencing around the facility.
  - ☐ Lockable doors
  - ☐ Other: .....
4. is there a disinfection drive-through tub for vehicles?
  - ☐ Yes
  - ☐ No
5. which of the following items do you use for multiple stalls/exits without prior disinfection?
  - ☐ Scales
  - ☐ Feed truck
  - ☐ Cleaning equipment
  - ☐ Drift boards
  - ☐ Sling
  - ☐ Spray guns
  - ☐ Marking pens
  - ☐ Tools
  - ☐ Ear marking pliers
  - ☐ Other:.....
  - ☐ Does not apply
  - ☐ Each barn has its own material.
6. do you share e.g. vehicles, machines or other equipment with other farms (joint use)?

- ☐ Yes
- ☐ No

7. When is cleaning and disinfection of compartments/outlets performed?

- ☐ After each stabling
- ☐ Less frequently than after each stall out.
- ☐ Periodically, interval: .....
- ☐ Never

8. When does cleaning and disinfection of drift paths outside of compartments occur?

- ☐ Daily
- ☐ Weekly
- ☐ Monthly
- ☐ After each stabling
- ☐ Rarely
- ☐ Never

9. Which includes cleaning and disinfecting the compartments?

- ☐ Floor
- ☐ Box partitions.
- ☐ Walls at animal height
- ☐ Walls up to the ceiling
- ☐ Ceiling
- ☐ Ventilation shafts
- ☐ Windows
- ☐ Outlet
- ☐ Pasture
- ☐ Piping system for drinking water
- ☐ Watering troughs
- ☐ Feed troughs/automatic feeders

10. What do you use to clean the stalls?

- ☐ Pitchfork, broom, or similar.
- ☐ Water hose
- ☐ High-pressure cleaner
- ☐ Other: .....

11. How long do you leave the cleaning agent to work?

- ☐ < 1h
- ☐ 1-4h
- ☐ > 4h
- ☐ Different
- ☐ No cleaning agent is used.

12. Do you allow the surfaces to dry after cleaning?

- ☐ Yes
- ☐ No

13. How long do you leave the disinfectant on?

- ☐ < 1h
- ☐ 1-4h

- ☐ > 4h
- ☐ Different
- ☐ No disinfectant is used.

14. What disinfectants do you use?

- ☐ Acids
- ☐ Aldehydes
- ☐ Oxygen separators
- ☐ Alcohols
- ☐ Chlorine and chlorine releasers
- ☐ Alkalis
- ☐ Phenol derivatives
- ☐ Quaternary ammonium compounds
- ☐ Agents approved for organic farming
- ☐ No disinfectant is used.
- ☐ Others: .....

15. Is there a disinfection plan?

- ☐ Yes
- ☐ No

16. Which pests do you control and with what? 1=traps, 2= poison, 3= biological

- ☐ Rodent pests, storage: .....
- ☐ Flies
- ☐ Other

17. Where is the manure/slurry stored?

- ☐ Inside the building
- ☐ Outside on the premises
- ☐ Field
- ☐ On concreted slab
- ☐ In a closed container
- ☐ In an open container
- ☐ Unpaved ground in the yard.

18. Where are dead animals stored?

- ☐ In the stall compartment
- ☐ On the grounds outside the stall compartment.

### **Diseases, use of drugs and antibiotics**

1. Can sick animals be housed in isolation from the others?

- ☐ Yes
- ☐ No

2. Where do sick pigs stay?

- ☐ In the pen
- ☐ they still have access to the run/pasture
- ☐ in a sick pen
- ☐ in a sick compartment, -stable

3. Is there a quarantine area?

- ☐ Yes
  - ☐ No
4. Do you use homeopathics on your pigs and if so, how often?
- ☐ No
  - ☐ Yes, rarely
  - ☐ Yes, regularly
  - ☐ Yes, very often
  - ☐ Yes, always
5. Are your pigs treated with antiparasitics (e.g., Panacur, Rintal, Flubenol, Dectomax, Ivomec, Belamisol)?
- ☐ No
  - ☐ No, but exercise and/or pasture areas are changed regularly.
  - ☐ Yes, regularly
  - ☐ Yes, irregularly
6. Please estimate how often the following diseases occur in your herd.
- a. Suckling piglets, weaners, finishing pigs, sows (never, rarely, often, regularly, always):
    - ☐ Inflammation of the joints
    - ☐ Hoof diseases
    - ☐ Neurological diseases (fever, disturbed general condition, swelling of joints, animal holds head crooked, convulsions, animal lies sideways with rowing legs on the floor)
    - ☐ Diarrhea
    - ☐ Diseases of the respiratory system
    - ☐ Skin diseases
  - b. Sows additionally:
    - ☐ Diseases of the urinary and genital system.
    - ☐ Postpartum diseases (decrease or cessation of milk production, disturbed general condition, fever, inflammation of the mammary gland)
  - c. General (never, rarely, often, regularly, always):
    - ☐ Injuries to teats
    - ☐ tail biting
    - ☐ Cannibalism
    - ☐ technopathies
7. Please estimate how often antibiotics are used
- ☐ Never
  - ☐ Maximum once for fattening pigs
  - ☐ Rarely
  - ☐ Sometimes
  - ☐ Often
  - ☐ Always
8. Please estimate how antibiotics are used
- ☐ Group treatment (☐ Never, ☐ Rarely, ☐ Sometimes, ☐ Often, ☐ Always).
  - ☐ single animal treatment (☐ never, ☐ rarely, ☐ sometimes, ☐ often, ☐ always).
9. Please estimate how the animals receive antibiotics
- ☐ Through feed (☐ never, ☐ rarely, ☐ sometimes, ☐ often, ☐ always).

- ☐ About the drinking water (☐ never, ☐ rarely, ☐ sometimes, ☐ often, ☐ always).  
Are the drinking water systems cleaned afterwards? ☐ Yes ☐ No
- ☐ Via an injection (syringe).

10. What preparations/active ingredients are used?

11. Are your pigs vaccinated against?

- ☐ Mycoplasma
- ☐ Circoviruses (PCV2)
- ☐ PRRSV
- ☐ Lawsonia (ileitis)
- ☐ Haemophilus parasuis (Glässers disease)
- ☐ Actinobacillus pleuropneumoniae
- ☐ vaccinated with herd-specific vaccines.
- ☐ vaccinated with autovaccines.

12. Are your pigs treated with antibiotics before purchasing new animals?

- ☐ Yes, always
- ☐ No, never
- ☐ Sometimes (how often, criteria?)

13. Are your animals treated with antibiotics before weaning?

- ☐ Yes
- ☐ No
- ☐ Sometimes (how often, criteria?)

14. Are your animals treated with antibiotics before regrouping?

- ☐ Yes
- ☐ No
- ☐ Sometimes (how often, criteria?).

15. Are your animals treated with antibiotics before regrouping?

- ☐ Yes
- ☐ No
- ☐ Sometimes (how often, criteria?)

16. Are your animals treated with antibiotics before transport?

- ☐ Yes
- ☐ No
- ☐ Sometimes (how often, criteria?)

17. If one animal in the group becomes ill and is given antibiotics, are the other animals in the group also treated with antibiotics as a precaution?

- ☐ Yes
- ☐ No
- ☐ Sometimes (how often, criteria?).

18. Has the group of animals under study been treated with antibiotics since being housed?

- ☐ Yes, all
- ☐ Yes, individual animals (how often, criteria?)  
If yes, which antibiotic (animals examined/others)?



- Diagnosis (A=respiratory, B=gastrointestinal, C=joints, D= CNS, E=skin, F=combat, G=claws, H=urinary and sexual tract, I=tail biting, cannibalism)?
  - How many animals?
  - How many days?
  - Which antibiotic?
  - Dosage per animal?
  - How administered (O=oral, S=syringe, L=local)?
  - ☐ No
19. Have the other groups of animals received antibiotic treatment since being housed?
- ☐ Yes, all
  - ☐ Yes, individual animals
  - ☐ No
20. What diseases are present in the herd at the time of the examination?

### **Husbandry**

1. With what is the lying surface bedded?
  - ☐ Cellulose products
  - ☐ Spelt husks
  - ☐ Straw
  - ☐ Other: .....
  - ☐ there is no interspersed lying area.
2. Is there a slatted floor?
  - ☐ Yes
  - ☐ No
3. Do your animals have a free range or live outdoors?
  - ☐ Yes:
    - ☐ → in summer
    - ☐ → in spring
    - ☐ → in autumn
    - ☐ → in winter
  - ☐ Year-round outdoor
  - ☐ Free range
  - ☐ No, neither outdoor nor free-range.
4. If outdoor or free-range:
  - a. Does the run have a roof?
    - ☐ yes, completely
    - ☐ yes, partially
    - ☐ no
  - b. Is the floor in the run paved?
    - ☐ Yes, completely

- ☐ Yes, partially
- ☐ No
- c. What is the type of floor in the run or outdoor enclosure?
  - ☐ Pasture land
  - ☐ Earth soil
  - ☐ Concrete
  - ☐ Plastic
  - ☐ Metal
  - ☐ Is there additional burrowing material/litter (e.g., in the form of straw)?
    - ☐ Yes
    - ☐ No
- d. Is the exercise area used by different animal groups (sows, fattening pigs, other animals) at the same time?
  - ☐ Yes
  - ☐ No
- e. Is the exercise area used by different groups of animals consecutively?
  - ☐ Yes
  - ☐ No
- f. Can mice, rats, and birds get into the exercise areas?
  - ☐ Yes: ☐ Mice ☐ Rats ☐ Birds
  - ☐ No
- g. Where does the drinking water in the outdoor facility come from?
  - ☐ Public water supply
  - ☐ Well with drinking water quality
  - ☐ Well without testing (livestock well).
  - ☐ No extra water
- h. Do livestock otherwise have access to water (e.g., stream/pond)?
  - ☐ Yes
  - ☐ No
- i. Are there puddles or boggy areas in the run?
  - ☐ Yes, always
  - ☐ Yes, at times
  - ☐ No, never
- 5. What type of stall do you have?
  - ☐ Deep litter barns
  - ☐ Sloping floor barns
  - ☐ Open-front barns
  - ☐ Other: ....
- 6. Soil
  - a. What is the type of floor in the barn?

- ☐ Fully slatted floor
- ☐ Partially slatted floor
- ☐ Full slatted floor with reduced slat percentage
- ☐ Floor fixed flat
- ☐ Deep litter/kicking manure method
- ☐ Other: ...

b. What material is the floor in the barn made of?

- ☐ Earthen floor
- ☐ Concrete
- ☐ Plastic
- ☐ Metal

7. What kind of ventilation is available?

- ☐ active (forced ventilation):
- ☐ passive (free ventilation):

8. What heating system is present?

Heating type:

9. Temperature in the barn?

### **Feeding**

1. Origin of the feed

- ☐ 100% company-owned
  - ☐ Partly own
  - ☐ purchased feed:
    - ☐ 1 supplier
    - ☐ several suppliers
- number of suppliers, constant or changing:

2. Do you use the farm's own basic feed (e.g. corn silage or green fodder) as supplementary feed?

- ☐ Yes
- ☐ No

3. Do you offer roughage, e.g. in the form of hay, green fodder or silage?

- ☐ Yes, everything from your own farm
- ☐ Yes, in proportions from your own farm
  - number of suppliers, constant or changing?
- ☐ Yes, but not from own company
  - number of suppliers, constant or changing?
- ☐ No

4. Feeding technique

- ☐ Rationed
- ☐ Ad libitum
- ☐ Trough feeding by hand
- ☐ Brewers

- ☐ Liquid feeding
  - ☐ Sensor feeding
  - ☐ Automatic dry feeder
  - ☐ Other: ...
5. How and where is the feed stored?

- ...

### Water supply

6. Origin of the drinking water
- ☐ Public water supply
  - ☐ Well with drinking water quality
  - ☐ Wells without testing
7. What types of watering troughs are used?
- ☐ Nipple drinkers
  - ☐ Cup drinkers/bowl drinkers
  - ☐ Trough

### Crop farming

1. do you practice crop farming?
- ☐ Yes
  - ☐ No
2. do you apply liquid manure/slurry/manure to the arable land?
- ☐ Yes: - only farm-owned
  - ☐ on-farm and off-farm
  - ☐ Off-farm only
  - ☐ No
3. Do you apply liquid manure/slurry/manure to the grassland areas?
- ☐ Yes
  - ☐ No
4. Do you grow cereals?
- ☐ Yes: exclusively from own farm.  
If yes, is straw from fields fertilized with liquid manure/slurry/manure used in your own livestock production?
  - ☐ From own farm as well as bought in
  - ☐ No
5. Is feed produced from these fertilized fields on your own farm and fed to your animals?
- ☐ Yes
  - ☐ No
6. Manure removal
- ☐ Liquid manure
  - ☐ Solid manure

### **Biogas plant**

1. Is this one present?
  - ☐ Yes
  - ☐ No
2. Which substrate is used?
  - ☐ Liquid manure
  - ☐ Manure
  - ☐ .....
3. Is only the farm's own material used?
  - ☐ Yes
  - ☐ No
4. Supplier farms:
  - Animal species: .....
  - Farm type: .....
  - Production type (e.g. organic): .....
5. Is the digestate applied to your own cropland/grassland?
  - ☐ Yes
  - ☐ No

### **Performance parameters**

Daily gain:

Feed conversion ratio:

Loss rate:

Fattening runs per year:
